# Supplementary material
Source: PubMed Central journal article supplement (PMC6895450)
Supplement: ajcr0009-2349-f8.pdf [file ajcr0009-2349-f8.pdf]

## The involvement of HSF1/ AMPK $\alpha$ 2 in oxaliplatin resistance

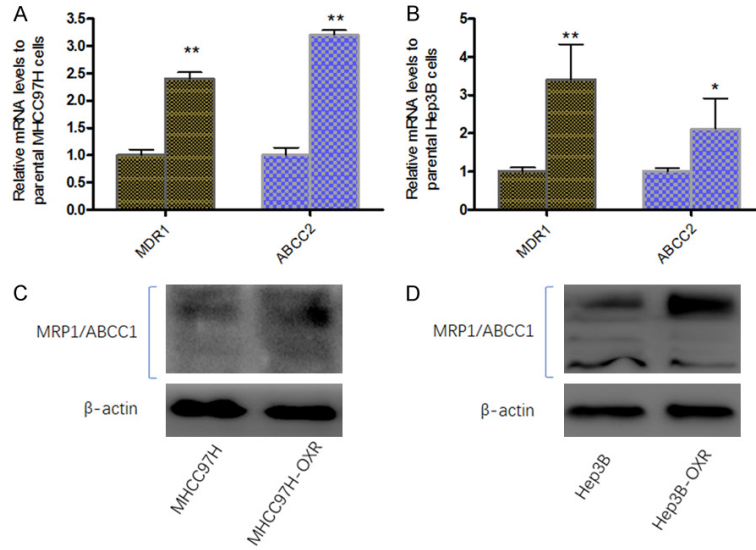

**Supplementary Figure 1.** The relative levels of MDR1 and ABCC2 mRNA and MRP1/ABCC1 protein in MHCC97H-OXR and Hep3B-OXR cells, compared to parental MHCC97H and Hep3B cells.

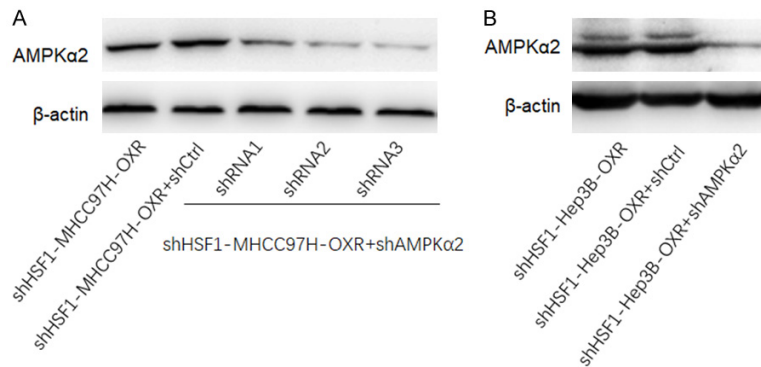

**Supplementary Figure 2.** A total of three shRNAs against AMPK $\alpha$ 2 were respectively transfected into shHSF1-MHCC97H-OXR cells and, based on the knockdown efficacy, the shRNA3 was chosen for subsequent experiments (A). Furthermore, the shRNA3 was reconfirmed in shHSF1-Hep3B cells (B).
